1 Targeting the endolysosomal host-SARS-CoV-2 interface by clinically licensed functional  
2 inhibitors of acid sphingomyelinase (FIASMA) including the antidepressant fluoxetine

3 Sebastian Schloer<sup>1,3#</sup>, Linda Brunotte<sup>2,3#</sup>, Jonas Goretzko<sup>1,3</sup>, Angeles Mecate-Zambrano<sup>2,3</sup>,  
4 Nadia Korthals<sup>1</sup>, Volker Gerke<sup>1,3</sup>, Stephan Ludwig<sup>2,3</sup>, Ursula Rescher<sup>1,3</sup>

5 running title: Fluoxetine inhibits SARS-CoV2 and IAV infection

6 <sup>1</sup>Institute of Medical Biochemistry, Center for Molecular Biology of Inflammation, and “Cells in  
7 Motion” Interfaculty Centre, University of Muenster, Von-Esmarch-Str. 56, D-48149,  
8 Muenster, Germany

9 <sup>2</sup>Institute of Virology, Center for Molecular Biology of Inflammation, and “Cells in Motion”  
10 Interfaculty Centre University of Muenster, Von-Esmarch-Street 56, D-48149 Muenster,  
11 Germany

12 <sup>3</sup>Interdisciplinary Centre for Clinical Research, University of Muenster, D-48149 Muenster,  
13 Germany

14 #authors contributed equally

15

16 corresponding author: Ursula Rescher, Institute of Medical Biochemistry, Center for Molecular  
17 Biology of Inflammation, University of Muenster, Von-Esmarch-Str. 56, D-48149 Muenster,  
18 Germany, Tel: +492518352121, email: rescher@uni-muenster.de

19

20 **Abstract**

21 The Corona Virus Disease 2019 (COVID-19) pandemic caused by the Severe Acute  
22 Respiratory Syndrome Related Coronavirus 2 (SARS-CoV-2) is a global health emergency. As  
23 only very limited therapeutic options are clinically available, there is an urgent need for the  
24 rapid development of safe, effective, and globally available pharmaceuticals that inhibit SARS-  
25 CoV-2 entry and ameliorate COVID-19. In this study, we explored the use of small compounds  
26 acting on the homeostasis of the endolysosomal host-pathogen interface, to fight SARS-CoV-  
27 2 infection. We find that fluoxetine, a widely used antidepressant and a functional inhibitor of  
28 acid sphingomyelinase (FIASMA), efficiently inhibited the entry and propagation of SARS-CoV-  
29 2 in the cell culture model without cytotoxic effects and also exerted potent antiviral activity  
30 against two currently circulating influenza A virus subtypes, an effect which was also observed  
31 upon treatment with the FIASMA's amiodarone and imipramine. Mechanistically, fluoxetine  
32 induced both impaired endolysosomal acidification and the accumulation of cholesterol within  
33 the endosomes. As the FIASMA group consists of a large number of small compounds that  
34 are well-tolerated and widely used for a broad range of clinical applications, exploring these  
35 licensed pharmaceuticals may offer a variety of promising antivirals for host-directed therapy  
36 to counteract enveloped viruses, including SARS-CoV-2 and COVID 19.

37 Key Words: SARS-CoV-2, IAV, FIASMA, fluoxetine, viral entry, endolysosomal interference

38

39

40

41

42

43

44

## 45 **Introduction**

46 The current outbreak of the Severe Acute Respiratory Syndrome Related Coronavirus 2  
47 (SARS-CoV-2) and the resulting Corona Virus Disease 2019 (COVID-19) pandemic clearly  
48 show the potential global threat of a newly emerging pathogen. The worldwide spread and the  
49 immense number of infected people worldwide pose not only a severe risk for the clinical  
50 management of individual patients but increasingly for the healthcare systems and the global  
51 economy in general <sup>1</sup>. While coronaviruses typically circulate in the human population and  
52 cause mild respiratory illness <sup>2</sup>, COVID-19 elicited by the zoonotic SARS-CoV-2 which is also  
53 transmitted from person to person <sup>3</sup> is a much more severe disease, and elderly patients and  
54 those with chronic medical conditions are at higher risk of serious illness <sup>4-7</sup>. As there are only  
55 very limited treatment options so far, unprecedented global efforts are made to limit  
56 transmission and develop tools and therapeutic strategies to combat infection and improve the  
57 outcome of the disease. Besides the development of efficient vaccines, therapeutic antibodies,  
58 and virus-targeting drugs, the identification of host cell factors that are required for the  
59 successful SARS-CoV-2 replication process might offer effective drug targets. Ideally, existing  
60 licensed drugs would be repurposed as a faster and cheaper pathway to develop new SARS-  
61 CoV-2 antivirals.

62 Typically for coronaviruses, the SARS-CoV-2 positive-strand RNA genome is packaged within  
63 the enveloped capsid<sup>8</sup>. Entry into host cells is induced by binding of the viral surface spike (S)  
64 protein, which protrudes from the virus envelope to the angiotensin-converting enzyme 2  
65 (ACE2) on the surface of the host cell <sup>9</sup>. According to its classification as a class I viral fusion  
66 protein, proteolytic cleavage is required to release the S protein fusogenic peptide, thus  
67 inducing the actual fusion event with the host cell membrane and the transfer of the viral  
68 genome into the cytosol <sup>9</sup>. S protein can be primed by several cellular proteases. Dependent  
69 on protease availability, cleavage can occur via the transmembrane protease serine 2  
70 (TMPRSS2), leading to fusion with the plasma membrane, and virus particles that are  
71 endocytosed following ACE2 binding can use endosome-residing proteases for fusion with the

72 endosomal membrane. Both pathways are shown to contribute to the SARS-CoV-2 infection  
73 process <sup>9</sup>.

74 For enveloped viruses that use the endocytic pathway in the entry process, the endosome is  
75 an important host-pathogen interface and the conditions of the endosomal environment  
76 critically affect the virus-endosome fusion and thus, endosomal escape <sup>10,11</sup>. Our previous  
77 studies identified the host cell cholesterol homeostasis as a crucial component of the infection  
78 process of endocytosed enveloped viruses. Importantly, we verified that the increase in late  
79 endosomal cholesterol is embedded in the interferon response against incoming influenza A  
80 virus (IAV) particles <sup>12</sup>, that this barrier has antiviral capacities when raised pharmacologically  
81 <sup>13,14</sup>, and that this druggable host cell target can be exploited through repurposed drugs in a  
82 preclinical murine infection model <sup>13</sup>.

83 Endosomal lipid balance is controlled via a broad range of feedforward as well as feedback  
84 circuits and is part of the intricate lipid sorting and degradation system that operates in late  
85 endosomes/lysosomes (LELs) <sup>15</sup>. Importantly, structurally unrelated small cationic amphiphilic  
86 molecules, such as the sterol derivative U18666A and a broad range of commonly used and  
87 well-tolerated human medications including the clinically licensed anti-depressant fluoxetine,  
88 are known to induce accumulation of cholesterol in LELs <sup>16</sup>. Whereas U18666A has been  
89 identified as a direct inhibitor of the endolysosomal cholesterol transport protein NPC1 <sup>17</sup>, the  
90 mode of action of other members of this drug class is less clear and might involve blockade of  
91 the sphingomyelin converting acid sphingomyelinase (ASMase) within the LELs <sup>16</sup>. In this  
92 study, we explored the impact of disturbed ASMase activity and endolysosomal cholesterol  
93 accumulation on SARS-CoV-2 infection in Vero E6 cells commonly used to investigate SARS-  
94 CoV-2 infection, and in polarized bronchial Calu-3 cell monolayers, a lung cell model for  
95 productive SARS-CoV-2 infection. Based on our previous results on the antiviral capacity of  
96 dysregulated endolysosomal cholesterol contents, we reasoned that clinically licensed drugs  
97 associated with lipid storage in LELs might be exploited as repurposed antivirals for host-  
98 directed therapy against SARS-CoV-2. Based on this rationale, we assessed the antiviral

99 potential of treatment with fluoxetine, a selective serotonin reuptake inhibitor (also known  
100 under the trade-name Prozac) commonly used to treat major depression and related disorders  
101 <sup>18</sup> on IAV and SARS-CoV-2 infection. Our results show that fluoxetine pretreatment inhibited  
102 IAV infection. Most importantly, fluoxetine treatment was able to inhibit acute SARS-CoV-2  
103 infection in a dose-dependent manner up to 99%. Notably, the inhibitory effects were also seen  
104 with two other FIASMA, amiodarone and imipramine. Our data support the hypothesis that  
105 the endolysosomal lipid balance is a promising druggable target at the host-virus interface for  
106 a wide variety of enveloped viruses, including IAV and SARS-CoV-2. Tapping this vast pool of  
107 potential antivirals for drug repurposing might be a fast and powerful approach to fight a broad  
108 range of pathogens with functionally similar modes of action, which is especially important for  
109 newly emerging viruses such as SARS-CoV-2.

## 110 **Material and Methods**

111 **Cells and treatment.** The human bronchioepithelial cell line Calu-3, the Madin-Darby canine  
112 kidney (MDCK) II cells, and the Vero E6 cell line were cultivated in Dulbecco's modified Eagle's  
113 medium (DMEM) supplemented with 10% standardized fetal bovine serum (FBS Advance;  
114 Capricorne), 2 mM L-glutamine, 100 U/mL penicillin, and 0.1 mg/mL streptomycin. All cell lines  
115 were cultured in a humidified incubator at 37°C and 5% CO<sub>2</sub>. Calu-3 were polarized on  
116 semipermeable membrane supports as described <sup>14</sup>. Fluoxetin (5 mM, Sigma) and the NPC1  
117 small molecule inhibitor U18666A (10 mg/mL, Biomol) and amiodarone (5mM, Sigma) were  
118 solubilized in DMSO and imipramine was solubilized in water (100mM, Sigma). Cells were  
119 treated with 2 µg/mL and /10 µg/mL of U18666A or the indicated fluoxetine, amiodarone and  
120 imipramine concentration either for 16 hours before infection or one hour post-infection (p.i) at  
121 the indicated drug concentrations for the entire 48 hours infection period.

122 **Cytotoxicity assay.** Calu-3 and Vero cells were treated at the indicated concentrations with  
123 the solvent DMSO, U18666A, fluoxetine, amiodarone and imipramine. The strong cytotoxic  
124 agent staurosporine (1 µM) served as a positive control for cytotoxic effects. Following 48 hours  
125 of treatment, MTT 3-(4,5-dimethylthiazol-2-yl)-2,5-diphenyltetrazolium bromide (Sigma) was

126 added to the cells for 4 h. The supernatant was aspirated, DMSO was added to the cells for 5  
127 min, and subsequently, the OD<sub>562</sub> was measured <sup>34</sup>.

128 ***Filipin staining and colocalization analysis.*** Cells were fixed with 4% PFA in PBS at room  
129 temperature for 10 min, subsequently washed twice with PBS and blocked with 2% BSA in  
130 PBS for 60 min. To visualize free cellular cholesterol, cells were stained with filipin (complex  
131 from *Streptomyces filipinensis*, 1.25 mg/mL, Sigma) for 2 hours. Late endosomal/lysosomal  
132 compartments were identified by staining the endolysosomal marker protein CD63 with the  
133 mouse monoclonal anti-CD63 antibody H5C6 (1:300 in 2% BSA in PBS) for 90 min. H5C6 was  
134 deposited to the DSHB by August, J.T. / Hildreth, J.E.K. (DSHB Hybridoma Product H5C6).  
135 The secondary AlexaFluor594-coupled anti-mouse antibody was from Thermo Fisher Limited.  
136 Confocal microscopy was performed with an LSM 780 microscope (CarlZeiss, Jena, Germany)  
137 equipped with a Plan-Apochro-mat 63x/1.4 oil immersion objective. The colocalization of filipin  
138 and CD63 signals was analyzed using the JACoP plugin <sup>35</sup> for Fiji <sup>36</sup>.

139 ***Endosomal pH measurement.*** Ratiometric fluorescence microscopy and calculation of  
140 endosomal pH were done as described <sup>12</sup>. In brief, cells were exposed to Oregon green 488  
141 (OG488)-labeled and tetramethylrhodamine (TMR)-labeled dextran (Invitrogen) (10 kDa) for  
142 60 min, followed by a 60 min chase. Cells were then washed and kept in HEPES-buffered  
143 Hanks' balanced salt solution (HBSS) at 37°C during image acquisition. The individual  
144 epifluorescence signals of each dye were acquired at intervals of 60 s, and the endosomal pH  
145 values of the cells were calculated according to the calibration curve generated by applying  
146 standard solutions ranging from pH 4.5 to 6.0 to cells.

147 ***Virus infection.*** Infection with the IAV isolates A/Hamburg/04/2009 (H1N1)pdm09 and  
148 A/Panama/2007/99 (H3N2) from the strain collection of the Institute of Virology, University of  
149 Münster, Germany, was carried out as previously described <sup>14</sup>. The SARS-CoV-2 isolate hCoV-  
150 19/Germany/FI1103201/2020 (EPI-ISL\_463008, mutation D614G in spike protein) was used  
151 for infection of Calu-3 cells and Vero E6 cells in infection-PBS (containing 0.2% BSA, 1%  
152 CaCl<sub>2</sub>, 1% MgCl<sub>2</sub>, 100 U/mL penicillin and 0.1 mg/mL streptomycin) at MOI 0.1 for 1 hour.

153 **Plaque assay.** To quantify virus production, supernatants of infected cells were collected at  
154 the indicated times p.i. and the number of infectious particles was determined by a standard  
155 plaque assay. In brief, MDCK cells (for IAV infection) or Vero E6 cells (for SARS-CoV-2  
156 infection) grown to a monolayer in six-well dishes were washed with PBS and infected with  
157 serial dilutions of the respective supernatants in infection-PBS for 1 hour at 37°C. The inoculum  
158 was replaced with 2x MEM (MEM containing 0.2% BSA, 2 mM L-glutamine 1 M HEPES, pH  
159 7.2, 7.5% NaHCO<sub>3</sub>, 100 U/mL penicillin, 0.1 mg/mL streptomycin, and 0.4% Oxoid agar) and  
160 incubated at 37°C. Virus plaques were visualized by staining with neutral red, and virus titers  
161 were calculated as plaque-forming units (PFU) per mL.

162 **Single-cycle infection assay.** Calu-3 cells were infected with SARS-CoV2 and fixed with 4%  
163 paraformaldehyde (PFA) in PBS for 15 min at room temperature at the indicated times p.i. To  
164 visualize the viral nucleoprotein (NP), cells were permeabilized with 0.2% Triton X-100 in PBS  
165 for 30 min, blocked with 2% BSA in PBS for > 1 h, and stained with anti-Nucleocapsid (clone  
166 #019 Sino Biological, 1:500 in 2% BSA in PBS) for 2 h, followed by staining with anti-rabbit  
167 Alexa Fluor 488 (1:500 in 2% BSA in PBS) for 1 h. Cell nuclei were stained with DAPI (Thermo  
168 Scientific, 1:1,000 in 2% BSA in PBS) for 10 min. Cells were analyzed by confocal microscopy  
169 using an LSM 800 microscope (Carl Zeiss, Jena, Germany), equipped with a Plan-Apochromat  
170 63x/ 1.4 oil immersion objective.

171 **Data analysis.** A priori power analysis (G\*Power 3.1<sup>37</sup>) was used to estimate the required  
172 sample sizes. Data were analyzed with Prism 8.00 (Graph-Pad). For dose-response curves,  
173 virus titers were normalized to percentages of the titers detected in control cells, and drug  
174 concentrations were log-transformed. EC values were calculated from the sigmoidal curve fits  
175 using a four-parameter logistic (4PL) model. For statistical analysis, significant differences  
176 were evaluated using one-way ANOVA followed by Dunnett's multiple comparison test.  
177 \*\*p<0.01, \*\*\*p< 0.001, \*\*\*\*p ≤ 0.0001.

## 178 **Results**

## 179 **Fluoxetine treatment impairs SARS-CoV-2 infection in Calu-3 and Vero cells**

180 Building on our previous work on the LEL cholesterol balance as a promising therapeutic target  
181 for treatment of enveloped viruses <sup>12-14,19</sup>, we first assessed the antiviral capability of fluoxetine  
182 on IAV infection. Because H1N1 and H3N2 subtypes are currently circulating in the human  
183 population, Calu-3 cells pretreated with fluoxetine for 16 h were infected with 0.01 MOI of either  
184 A/Hamburg/04/2009 (H1N1)pdm09 or A/Panama/2007/99 (H3N2), and the resulting virus titers  
185 were measured 24 h p.i. by a standard plaque assay (Fig. 1A). Fitting of the dose-response  
186 curves using nonlinear regression and a four-parameter logistic model revealed for both virus  
187 subtypes 50% effective fluoxetine concentrations ( $EC_{50}$  values) at approximately 1  $\mu$ M, and  
188  $EC_{90}$  values of approximately 5 - 6  $\mu$ M.

189 These results prompted us to assess the antiviral potential of fluoxetine treatment in SARS-  
190 CoV-2 infected Vero and Calu-3 cells, two cell lines that are known to produce infectious virus  
191 progeny upon SARS-CoV-2 exposure. To analyze the usability of fluoxetine in a more clinically  
192 relevant scenario, i.e. an acute infection, we treated the cells 1 h p.i. with a range of fluoxetine  
193 concentrations and measured the resulting virus titers 48 h p.i. by a standard plaque assay  
194 (Fig. 2A). While both Vero and Calu-3 control cells treated with the solvent yielded high viral  
195 titers which are in line with previously published results <sup>9</sup>, dose-dependent inhibition of virus  
196 release was observed in both fluoxetine-treated cell lines (Fig. 2A). For both cell lines, 50%  
197 effective fluoxetine concentrations ( $EC_{50}$  values) were below 1  $\mu$ M. The 90% inhibition was  
198 achieved at ~ 2  $\mu$ M for Vero and 4  $\mu$ M for Calu-3 cells, and higher doses could reduce SARS-  
199 CoV-2 titers up to 99% in both cell lines (Fig. 2B).

200 Next, we employed Calu-3 cells polarized on semipermeable membrane support to confirm  
201 the results in cells with apicobasal polarity, and thus in a more physiological setting <sup>14</sup>. Because  
202 our previously published results had revealed that increased endolysosomal cholesterol levels  
203 act as an effective antiviral barrier for enveloped viruses, including influenza viruses <sup>12-14,19</sup>, we  
204 also tested the impact of a post-infection treatment with U18666A, a small molecule inhibitor  
205 of the endolysosomal cholesterol transporter NPC1 <sup>17</sup> on SARS-CoV-2 infection. As shown in



206 Fig. 2C, the fluoxetine-mediated inhibition on SARS-CoV2 propagation was faithfully  
207 reproduced in the polarized cell model. Of note, U18666A treatment was also antiviral, with a  
208 lower concentration of 2  $\mu\text{g}/\text{mL}$  reducing the viral titers to 75%, and the higher 10  $\mu\text{g}/\text{mL}$  dose  
209 displaying a more pronounced antiviral effect of a 99% reduction. Because unwanted cytotoxic  
210 effects are one of the main causes for the withdrawal of approved drugs, we measured the  
211 impact of U18666A and fluoxetine treatments on Calu-3 and Vero cell viability. As shown in  
212 Suppl. Fig. 1, both drug treatments were well tolerated, and cell viability was unaffected over  
213 the whole range of the applied dosages and the 48 h treatment period. To evaluate the antiviral  
214 potential of the FIASMA group as such, we additionally assessed the antiviral capacity of  
215 amiodarone and imipramine. As shown in Fig. 3, both drug treatments reduced SARS-CoV-2  
216 and IAV titers  $\geq 90\%$  without any cytotoxic effects, thus supporting our hypothesis.

### 217 **Fluoxetine treatment is associated with increased endolysosomal cholesterol storage** 218 **and dysregulated acidification**

219 Because the pronounced decrease in SARS-CoV-2 titers observed upon treatment with  
220 U18666A hinted at an antiviral capacity of dysregulated endolysosomal cholesterol contents  
221 in SARS-CoV-2 infection, we next determined whether fluoxetine treatment of Vero and Calu-  
222 3 cells was associated with increased endolysosomal cholesterol pools. We acquired z-stacks  
223 from confocal microscopy using CD63 as the specific endolysosomal marker protein<sup>20</sup> and the  
224 polyene macrolide filipin as the cholesterol probe<sup>12,20</sup>. Filipin is highly fluorescent, binds to  
225 unesterified cholesterol in cellular membranes, and the resulting complexes visualize  
226 cholesterol by microscopy<sup>21</sup>. As shown in Fig. 4, for both solvent-treated Calu-3 and Vero  
227 cells, filipin stain was diffuse, and only a weak signal was detected in LELs. As expected,  
228 blocking endolysosomal cholesterol efflux through inhibition of the major endolysosomal  
229 cholesterol transport protein NPC1 with U18666A resulted in the prominent appearance of  
230 LELs highly enriched for cholesterol. Of note, fluoxetine at 20  $\mu\text{M}$  also induced the appearance  
231 of strong filipin signals in perinuclear vesicles, indicating endolysosomal cholesterol  
232 accumulation. For better visualization, the filipin pixels were also color-encoded according to  
233 their intensities, resulting in the filipin heatmap (Fig. 4A). For unbiased quantitative image

234 analysis, we calculated the well-established Manders' coefficient for the co-occurrence of filipin  
235 with CD63 signals over the entire volume of the cell. The resulting ratio indicates the total  
236 amount of overlapping fluorophore signals and, therefore, indicates changes in endolysosomal  
237 cholesterol contents <sup>12,13</sup>. In line with the images, this quantitative colocalization analysis (Fig  
238 4B), revealed that fluoxetine at a low concentration of 5  $\mu$ M caused slightly, yet not significantly  
239 elevated cholesterol levels in CD63-positive LELs, whereas treatment with 20  $\mu$ M fluoxetine  
240 induced a prominent and significant endolysosomal cholesterol accumulation. The strongest  
241 increase in cholesterol levels was observed when cholesterol efflux was directly blocked by  
242 the NPC1 inhibitor U18666A.

243 A key feature of the late endosomal compartment is the acidic pH. We, therefore, assessed  
244 whether fluoxetine treatment impacted endolysosomal pH values in Calu-3 cells, utilizing a  
245 quantitative ratiometric fluorescence microscopy assay <sup>12,13</sup>. In control cells, the measured pH  
246 was at a value of 4.7, whereas cells exposed to 10  $\mu$ g/mL U18666A displayed a significantly  
247 reduced acidification, well in agreement with our previously reported data of the impact of  
248 higher U18666A concentrations on pH values in LELs <sup>19</sup>. Of note, the endolysosomal  
249 acidification was also affected upon fluoxetine treatment, and this was already observed in  
250 cells treated with the low 5  $\mu$ M concentration (Figure 4C).

251 To analyze the time point of inhibition, we performed a single-cycle infection assay. Fluoxetine  
252 and U18666A were added to the cells 16 h before infection, and cells were infected at MOI 1.  
253 Infected cells were then identified 8 hrs p.i. through detection of the SARS-CoV-2 nucleoprotein  
254 by immunofluorescence staining. Both drugs impressively reduced the number of NP-positive  
255 cells in both Vero and Calu-3 cells (Fig. 5), indicating that their antiviral activities occurred  
256 before the release of virus progeny. Detectable NP signals were seen in 17% of the Vero cells.  
257 Of note, even a low 5  $\mu$ M fluoxetine treatment could reduce the number of visibly infected Vero  
258 cells to 5%, and the higher dose of 20  $\mu$ M reduced the levels of infected cells to 2%, indicating  
259 a 90% inhibition of cells with detectable SARS-CoV-2 infection. In contrast to the dose-

260 response assays, this assay does not discriminate between different signal strengths, and EC<sub>50</sub>  
261 values are, therefore, not directly comparable.

## 262 **Discussion**

263 In this study, we explored the use of small compounds that target the endolysosomal host-  
264 pathogen interface to interfere with SARS-CoV-2 infection. Enveloped viruses often exploit the  
265 host cell endocytic machinery for a safe transit into the cell. A critical step in the infection cycle  
266 is the fusion of the virus envelope with the cell membrane to transfer the viral genome into  
267 the cytosol. Whereas IAV transfers the viral genome through fusion with the endosomal  
268 membrane [10,22–24], SARS-CoV-2 can fuse directly with the plasma membrane<sup>9</sup>. However,  
269 recent evidence confirms that SARS-CoV-2 also uses endocytic uptake to enter the host cell  
270<sup>25</sup> and full blocking of SARS-CoV-2 entry was only achieved when both the proteolytic activities  
271 of TMPRSS2 at the plasma membrane as well as of the endolysosomal cathepsins were  
272 blocked<sup>9</sup>.

273 As endosomes move deeper into the cell, the pH in the lumen drops continuously, and this  
274 acidification distinguishes earlier from later stages of endosome maturation<sup>26,27</sup>, thus indicating  
275 the successful progression of the virus-carrying endosomes into deeper parts of the cell.  
276 Therefore, endocytosed viruses often use the pH drop as a trigger for their endosomal escape  
277<sup>10</sup>. Moreover, the presentation of the viral fusogenic peptide is often supported through  
278 proteolytic cleavage by acid pH-dependent endolysosomal proteases<sup>10</sup>. Proper  
279 endolysosomal function also requires the tight control of endolysosomal lipids, and both  
280 maintenance of the acidic pH and lipid balance are profoundly connected<sup>28,29</sup>. Based on our  
281 earlier studies showing that the increase in endolysosomal endosomal cholesterol is  
282 embedded in the cell-autonomous interferon response against incoming influenza viruses, that  
283 this barrier has antiviral capacities when raised pharmacologically via repurposing of already  
284 licensed drugs, and is a druggable host cell target in a preclinical murine infection model<sup>12–</sup>  
285<sup>14,19</sup>, we investigated the impact of blocked endolysosomal cholesterol egress. Our results  
286 confirmed our previous results on IAV infection and show that increased endolysosomal

287 cholesterol levels, together with the accompanying alterations in luminal pH, also impair  
288 SARS-CoV-2 infection. Elevated cholesterol levels in the endolysosomal membranes render  
289 the vacuolar-type membrane ATPase (v-ATPase), the endolysosomal proton pump  
290 responsible for pH maintenance <sup>30</sup>, inactive <sup>28</sup>. Thus, the pH control within LELs might serve  
291 as a valuable antiviral target, a notion that is supported by the recent report on the inhibitory  
292 effect of the v-ATPase inhibitor bafilomycin A on SARS-CoV-2 cellular entry <sup>25</sup>. However, the  
293 substantial toxicity prevents the clinical use of this macrolide antibiotic <sup>31</sup>, and similar concerns  
294 limit the therapeutical use of U18666A <sup>32</sup>. Dysbalanced endosomal cholesterol handling is also  
295 caused by inhibitory mutations in the endolysosomal enzyme acid sphingomyelinase  
296 (ASMase) which converts sphingomyelin to ceramide and phosphorylcholine in response to  
297 cell stress <sup>31</sup>. ASMase activity is functionally inhibited by a large group of heterogeneous small  
298 compounds that are positively charged in an acidic environment such as the endolysosomal  
299 lumen. These so-called functional inhibitors of sphingomyelinase (FIASMA) are clinically  
300 approved, generally well-tolerated, and widely used in human medicine for the treatment of a  
301 broad spectrum of pathological conditions <sup>16</sup>. The FIASMA fluoxetine, trade-named Prozac, is  
302 a selective serotonin reuptake inhibitor that boomed in the 1980s and 1990s in the US and is  
303 commonly used to treat major depression and related disorders. Our results show that  
304 fluoxetine treatment was capable of inhibiting SARS-CoV-2 infection in a dose-dependent  
305 manner, with an EC<sub>50</sub> value below 1 μM, and that the application of 10 μM fluoxetine severely  
306 reduced viral titers up to 99%. Fluoxetine-mediated pH neutralization was already seen at a  
307 low dose, whereas enhanced endolysosomal cholesterol pools were only visible when a higher  
308 dose was used.

309 Our results support the hypothesis that although there is quite some variation in the actual  
310 escape mechanisms <sup>11</sup>, targeting the viral entry might serve as a target for antiviral therapy<sup>33</sup>.  
311 The intricate regulatory circuits that underly endolysosomal lipid balance and functionality are  
312 key elements functioning at the endolysosomal host-virus interface and are promising  
313 druggable targets for a wide variety of viruses and might be a fast and versatile approach to  
314 fight a broad range of pathogens with functionally similar modes of action. Because of the

315 essential need for the host cell components, the infection cycle would have to be drastically  
316 altered to circumvent such host-directed therapeutics, and this approach is therefore  
317 considered much less likely to cause the development of resistance. The large variety of  
318 FIASMA pharmaceuticals offer a toolbox of potential antivirals for host-directed therapy, and  
319 exploring their use including their combination with drugs that directly target viral enzymes,  
320 might constitute a promising approach to repurpose these drugs as antivirals to counteract  
321 SARS-CoV-2 and COVID 19.

## 322 **Acknowledgements**

323 We thank Jonathan Hentrey and Andreas Wilbers for help with the assays. This research was  
324 funded by grants from GERMAN RESEARCH FOUNDATION (DFG), CRC1009 “Breaking  
325 Barriers”, Project A06 (to U.R.) and B02 (to S.L.), CRC1348 “Dynamic Cellular Interfaces”,  
326 Project A11 (to U.R.), KFO342 TP6, Br5189/3-1 (to L.B.), Lu477/30-1 (to S.L.),  
327 INTERDISCIPLINARY CENTER FOR CLINICAL RESEARCH (IZKF) of the Münster Medical  
328 School, grant number Re2/022/20 and from the Innovative Medizinische Forschung (IMF) of  
329 the Münster Medical School, grant number SC121912 (to S.S.).

## 330 **Author contributions**

331 Conceptualization, supervision and funding acquisition was done by U.R.; S.S. conceived the  
332 experiments and, together with J.G., A.M-Z., and N.K. carried out the experimental work and  
333 the data analysis. L.B., V.G., and S.L. provided resources and methodology. All authors have  
334 read and agreed to the submitted version of the manuscript.

## 335 **Competing interests**

336 The authors declare no competing interests.

## 337 **References**

338 1 Wu JT, Leung K, Bushman M *et al.* Estimating clinical severity of COVID-19 from the  
339 transmission dynamics in Wuhan, China. *Nat Med* 2020; **26**: 506–510.

- 340 2 Corman VM, Lienau J, Witzentrath M. Coronaviruses as the cause of respiratory  
341 infections. *Internist* 2019; **60**: 1136–1145.
- 342 3 Chan JFW, Yuan S, Kok KH *et al.* A familial cluster of pneumonia associated with the  
343 2019 novel coronavirus indicating person-to-person transmission: a study of a family  
344 cluster. *Lancet* 2020; **395**: 514–523.
- 345 4 Fehr AR, Channappanavar R, Perlman S. Middle East Respiratory Syndrome:  
346 Emergence of a Pathogenic Human Coronavirus. *Annu Rev Med* 2017; **68**: 387–399.
- 347 5 Wang D, Hu B, Hu C *et al.* Clinical Characteristics of 138 Hospitalized Patients with  
348 2019 Novel Coronavirus-Infected Pneumonia in Wuhan, China. *JAMA - J Am Med*  
349 *Assoc* 2020; **323**: 1061–1069.
- 350 6 Guo T, Fan Y, Chen M *et al.* Cardiovascular Implications of Fatal Outcomes of  
351 Patients with Coronavirus Disease 2019 (COVID-19). *JAMA Cardiol* 2020.  
352 doi:10.1001/jamacardio.2020.1017.
- 353 7 Tang N, Li D, Wang X, Sun Z. Abnormal coagulation parameters are associated with  
354 poor prognosis in patients with novel coronavirus pneumonia. *J Thromb Haemost*  
355 2020; **18**: 844–847.
- 356 8 Zhou P, Yang X Lou, Wang XG *et al.* A pneumonia outbreak associated with a new  
357 coronavirus of probable bat origin. *Nature* 2020; **579**: 270–273.
- 358 9 Hoffmann M, Kleine-Weber H, Schroeder S *et al.* SARS-CoV-2 Cell Entry Depends on  
359 ACE2 and TMPRSS2 and Is Blocked by a Clinically Proven Protease Inhibitor. *Cell*  
360 2020; **181**: 271–280.e8.
- 361 10 White JM, Whittaker GR. Fusion of Enveloped Viruses in Endosomes. *Traffic* 2016;  
362 **17**: 593–614.
- 363 11 Staring J, Raaben M, Brummelkamp TR. Viral escape from endosomes and host  
364 detection at a glance. *J Cell Sci* 2018; **131**. doi:10.1242/jcs.216259.
- 365 12 Kühnl A, Musiol A, Heitzig N *et al.* Late endosomal/lysosomal cholesterol  
366 accumulation is a host cell-protective mechanism inhibiting endosomal release of  
367 influenza A virus. *MBio* 2018; **9**.
- 368 13 Schloer S, Goretzko J, Kühnl A, Brunotte L, Ludwig S, Rescher U. The clinically  
369 licensed antifungal drug itraconazole inhibits influenza virus *in vitro* and *in vivo*. *Emerg*  
370 *Microbes Infect* 2019; **8**: 80–93.
- 371 14 Schloer S, Goretzko J, Pleschka S, Ludwig S, Rescher U. Combinatory Treatment

- 372 with Oseltamivir and Itraconazole Targeting Both Virus and Host Factors in Influenza  
373 A Virus Infection. *Viruses* 2020; **12**: 703.
- 374 15 Bissig C, Gruenberg J. Lipid sorting and multivesicular endosome biogenesis. *Cold*  
375 *Spring Harb. Perspect. Biol.* 2013; **5**. doi:10.1101/cshperspect.a016816.
- 376 16 Kornhuber J, Tripal P, Reichel M *et al.* Functional Inhibitors of Acid Sphingomyelinase  
377 (FIASMs): A Novel Pharmacological Group of Drugs with Broad Clinical Applications.  
378 2010.
- 379 17 Lu F, Liang Q, Abi-Mosleh L *et al.* Identification of NPC1 as the target of U18666A, an  
380 inhibitor of lysosomal cholesterol export and Ebola infection. *Elife* 2015; **4**.  
381 doi:10.7554/eLife.12177.
- 382 18 Wong DT, Bymaster FP, Engleman EA. Prozac (fluoxetine, lilly 110140), the first  
383 selective serotonin uptake inhibitor and an antidepressant drug: Twenty years since its  
384 first publication. *Life Sci.* 1995; **57**: 411–441.
- 385 19 Musiol A, Gran S, Ehrhardt C *et al.* Annexin A6-balanced late endosomal cholesterol  
386 controls influenza a replication and propagation. *MBio* 2013; **4**: 1–11.
- 387 20 Poeter M, Brandherm I, Rossaint J *et al.* Annexin A8 controls leukocyte recruitment to  
388 activated endothelial cells via cell surface delivery of CD63. *Nat Commun* 2014; **5**:  
389 3738.
- 390 21 Maxfield FR, Wüstner D. Analysis of Cholesterol Trafficking with Fluorescent Probes.  
391 In: *Methods in Cell Biology*. Academic Press Inc., 2012, pp 367–393.
- 392 22 Edinger TO, Pohl MO, Stertz S. Entry of influenza A virus: Host factors and antiviral  
393 targets. *J Gen Virol* 2014; **95**: 263–277.
- 394 23 Lozach P-Y, Huotari J, Helenius A. Late-penetrating viruses. *Curr Opin Virol* 2011; **1**:  
395 35–43.
- 396 24 Mercer J, Schelhaas M, Helenius A. Virus entry by endocytosis. *Annu. Rev. Biochem.*  
397 2010; **79**: 803–833.
- 398 25 Ou X, Liu Y, Lei X *et al.* Characterization of spike glycoprotein of SARS-CoV-2 on  
399 virus entry and its immune cross-reactivity with SARS-CoV. *Nat Commun* 2020; **11**: 1–  
400 12.
- 401 26 Johnson DE, Ostrowski P, Jaumouillé V, Grinstein S. The position of lysosomes within  
402 the cell determines their luminal pH. *J Cell Biol* 2016; **212**: 677–692.
- 403 27 Huotari J, Helenius A. Endosome maturation. *EMBO J* 2011; **30**: 3481–3500.

- 404 28 Lafourcade C, Sobo K, Kieffer-Jaquinod S, Garin J, van der Goot FG. Regulation of  
405 the V-ATPase along the Endocytic Pathway Occurs through Reversible Subunit  
406 Association and Membrane Localization. *PLoS One* 2008; **3**: e2758.
- 407 29 Desai TM, Marin M, Chin CR, Savidis G, Brass AL, Melikyan GB. IFITM3 Restricts  
408 Influenza A Virus Entry by Blocking the Formation of Fusion Pores following Virus-  
409 Endosome Hemifusion. *PLoS Pathog* 2014; **10**: e1004048.
- 410 30 Marshansky V, Futai M. The V-type H<sup>+</sup>-ATPase in vesicular trafficking: targeting,  
411 regulation and function. *Curr. Opin. Cell Biol.* 2008; **20**: 415–426.
- 412 31 Lloyd-Evans E, Morgan AJ, He X *et al.* Niemann-Pick disease type C1 is a  
413 sphingosine storage disease that causes deregulation of lysosomal calcium. *Nat Med*  
414 2008; **14**: 1247–1255.
- 415 32 Cenedella RJ, Jacob R, Borchman D *et al.* Direct perturbation of lens membrane  
416 structure may contribute to cataracts caused by U18666A, an oxidosqualene cyclase  
417 inhibitor. *J Lipid Res* 2004; **45**. doi:10.1194/jlr.M300469-JLR200.
- 418 33 Mazzon M, Marsh M. Targeting viral entry as a strategy for broad-spectrum antivirals.  
419 F1000Research. 2019; **8**. doi:10.12688/f1000research.19694.1.
- 420 34 Mosmann T. Rapid colorimetric assay for cellular growth and survival: Application to  
421 proliferation and cytotoxicity assays. *J Immunol Methods* 1983; **65**: 55–63.
- 422 35 Bolte S, Cordelières FP. A guided tour into subcellular colocalization analysis in light  
423 microscopy. *J. Microsc.* 2006; **224**: 213–232.
- 424 36 Schindelin J, Arganda-Carreras I, Frise E *et al.* Fiji: An open-source platform for  
425 biological-image analysis. *Nat. Methods.* 2012; **9**: 676–682.
- 426 37 Faul F, Erdfelder E, Lang A-G, Buchner A. G\*Power 3: A flexible statistical power  
427 analysis program for the social, behavioral, and biomedical sciences. *Behav Res*  
428 *Methods* 2007; **39**: 175–191.

429

430

431

432

433



## 434 **Figure Legends**

435 **Figure 1.** Antiviral potential of fluoxetine treatment against IAV subtypes pdm09 and Panama  
436 in Calu-3 cells. (A) Virus titers determined in Calu-3 cells infected with the respective IAV  
437 subtype at 0.01 MOI for 24 h. Cells were pretreated with solvent or fluoxetine for 16 h. Data  
438 points present mean virus titers  $\pm$  SEM of three independent experiments. (B) Released viral  
439 titers normalized to the control condition and log-transformed fluoxetine concentrations were  
440 used to generate the dose-response curves. EC<sub>50</sub> and EC<sub>90</sub> values were determined using the  
441 4PL nonlinear regression model.

442 **Figure 2.** Analysis of anti-SARS-CoV-2 activities of fluoxetine and U18666A treatment in Vero  
443 E6 cells and Calu-3 cells. (A) Virus titers determined in Calu-3 and Vero cells infected with  
444 SARS-CoV-2 at 0.1 MOI for 48 h. Treatment of infected cells with solvent or fluoxetine was  
445 started 1 h p.i. Data points present mean virus titers  $\pm$  SEM of three independent experiments.  
446 (B) To generate the dose-response curves, virus release was normalized to the control  
447 condition, fluoxetine concentrations were log-transformed, and nonlinear regression and a 4PL  
448 model was used to fit the curves and to determine the EC<sub>50</sub> and EC<sub>90</sub> values. (C) Polarized  
449 Calu-3 cells grown on semipermeable supports were infected with SARS-CoV-2 isolate at 0.1  
450 MOI for 48 h. Cells were treated 1 h p.i. with 20  $\mu$ M fluoxetine, and 2 or 10  $\mu$ g/mL U18666A.  
451 Bar graphs represent the mean viral titers  $\pm$  SEM of three independent experiments. One-way  
452 ANOVA followed by by Dunnett's multiple comparison test. \*\*p  $\leq$  0.01, \*\*\*p  $\leq$  0.001.

453 **Figure 3.** Amiodarone and imipramine as two classic representative of the FIASMA group  
454 reduced SARS-CoV2 and IAV Panama titer. Virus titers determined in Calu-3 cells infected  
455 with (A) SARS-CoV-2 at 0.1 MOI for 48 h or (B) with the IAV strain Panama at 0.01 MOI for 24  
456 h. Treatment of infected cells with solvent or amiodarone (5  $\mu$ M) or imipramine (50  $\mu$ M) was  
457 started 1 h p.i. Data points present mean virus titers  $\pm$  SEM of three independent experiments.  
458 (C) Analysis of cell viability. MTT assay of Calu-3 cells treated with the solvent DMSO (C),  
459 amiodarone (5  $\mu$ M) or imipramine (50  $\mu$ M) for 48 h. The protein kinase inhibitor staurosporine  
460 (ST), a strong inducer of cytotoxicity, served as a positive control. Bar graphs represent the

461 mean viral titers  $\pm$  SEM of three independent experiments. One-way ANOVA followed by  
462 Dunnett's multiple comparison test; \*\* $p \leq 0.01$ , \*\*\*\* $p \leq 0.0001$ .

463 **Figure 4.** Increased endolysosomal cholesterol storage and dysregulated acidification upon  
464 fluoxetine treatment. Vero cells were treated for 16 h with either the solvent DMSO, fluoxetine,  
465 or U18666A at the indicated concentrations. (A) Representative 2D maximum intensity  
466 projections of entire z-stacks obtained by confocal imaging. LELs were identified via  
467 immunodetection of the LEL marker protein CD63 and unesterified cholesterol was visualized  
468 using filipin. Representative pseudocolored digital images are shown. To generate the heat  
469 maps, filipin-positive pixels were color-encoded according to their intensity values. Scale bar,  
470 20  $\mu\text{m}$ . (B) For each cell, the colocalization of filipin with CD63 quantitated across the entire z-  
471 stack was calculated as Manders' coefficient. Bar graphs represent means  $\pm$  SEM of 3  
472 individual cells per condition from three independent experiments. (C) Endolysosomal pH  
473 values in Calu-3 cells were measured by ratio imaging. Bar graphs present mean pH values  $\pm$   
474 SEM of 56 cells for each condition from three independent experiments. One-way ANOVA  
475 followed by Dunnett's multiple comparison test; ns, not significant, \*\* $p \leq 0.01$ , \*\*\* $p \leq 0.001$ ,  
476 \*\*\*\* $p \leq 0.0001$ .

477 **Figure 5.** Impact of fluoxetine and U18666A on SARS-CoV-2 infection success within the first  
478 cycle of replication. (A) Vero and (B) Calu-3 cells pretreated with the drugs at the indicated  
479 concentrations were infected with SARS-CoV-2 at 1 MOI for 1 h. Nuclei were visualized with  
480 DAPI. To determine infection rates, NP-positive cells were detected by immunofluorescence  
481 imaging. Mean percentages  $\pm$  SEM of NP-positive cells were calculated from 3 independent  
482 experiments. One-way ANOVA followed by by Dunnett's multiple comparison test.  
483 \*\*\*\* $p \leq 0.0001$ .

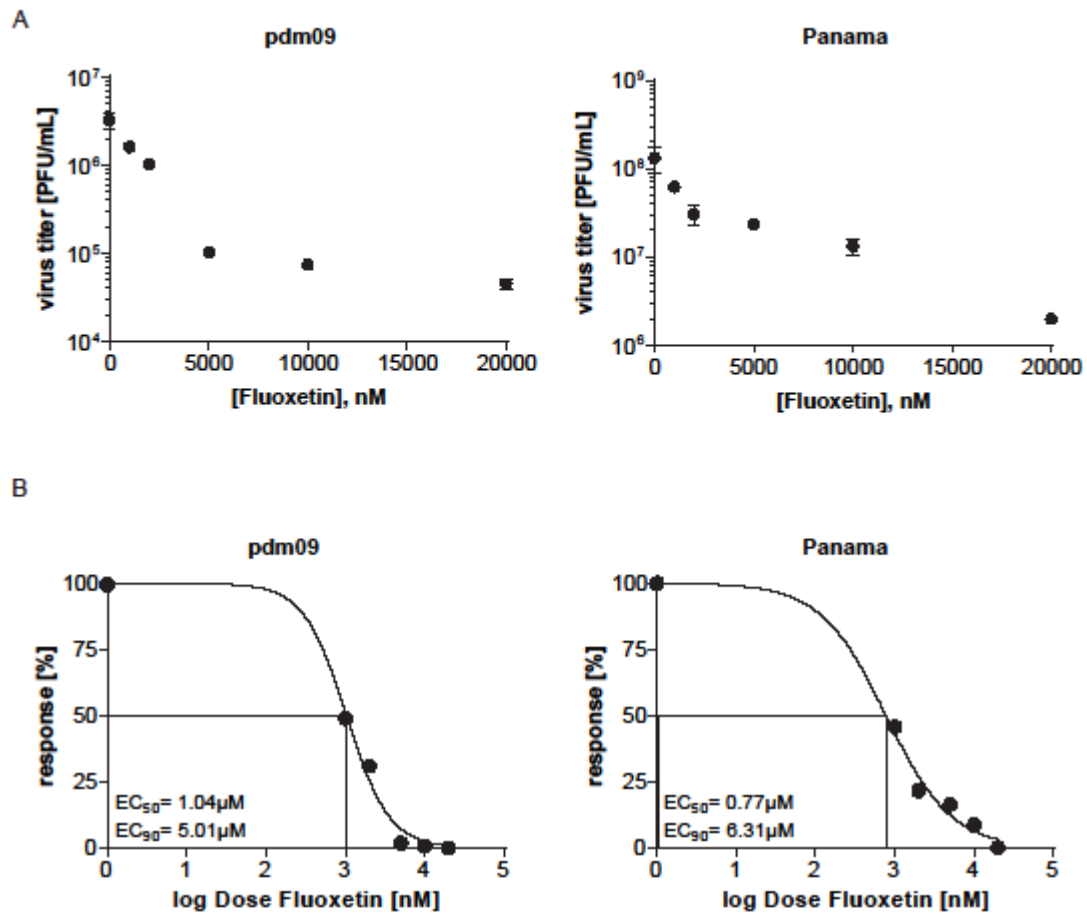

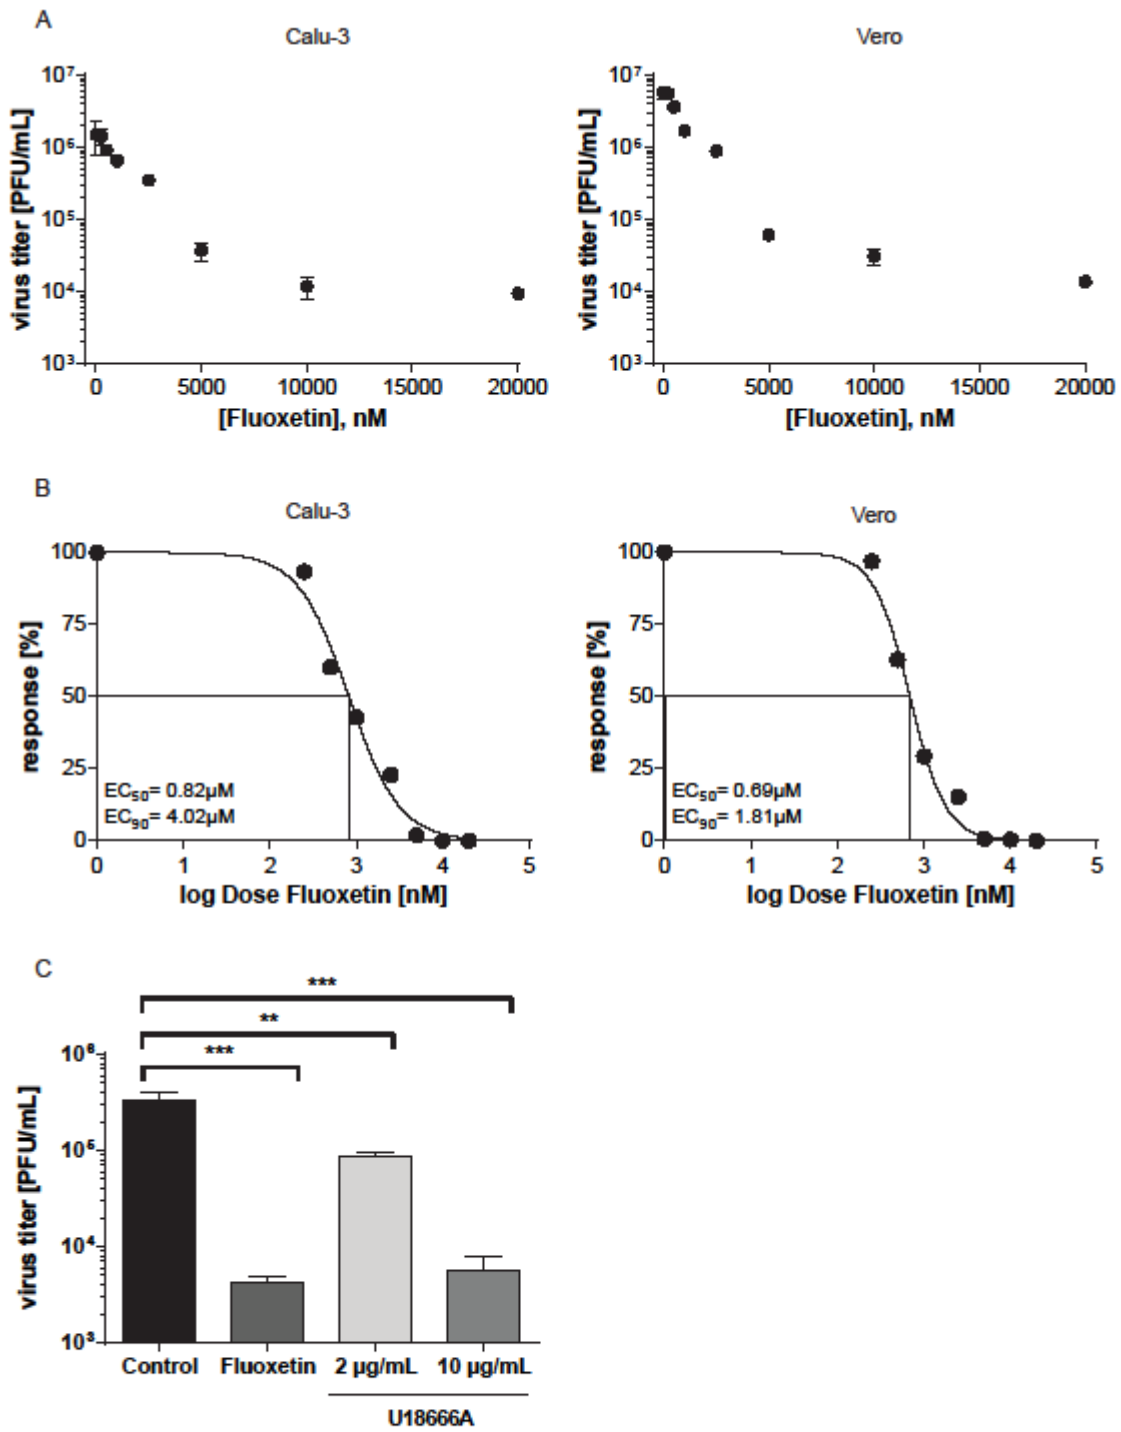

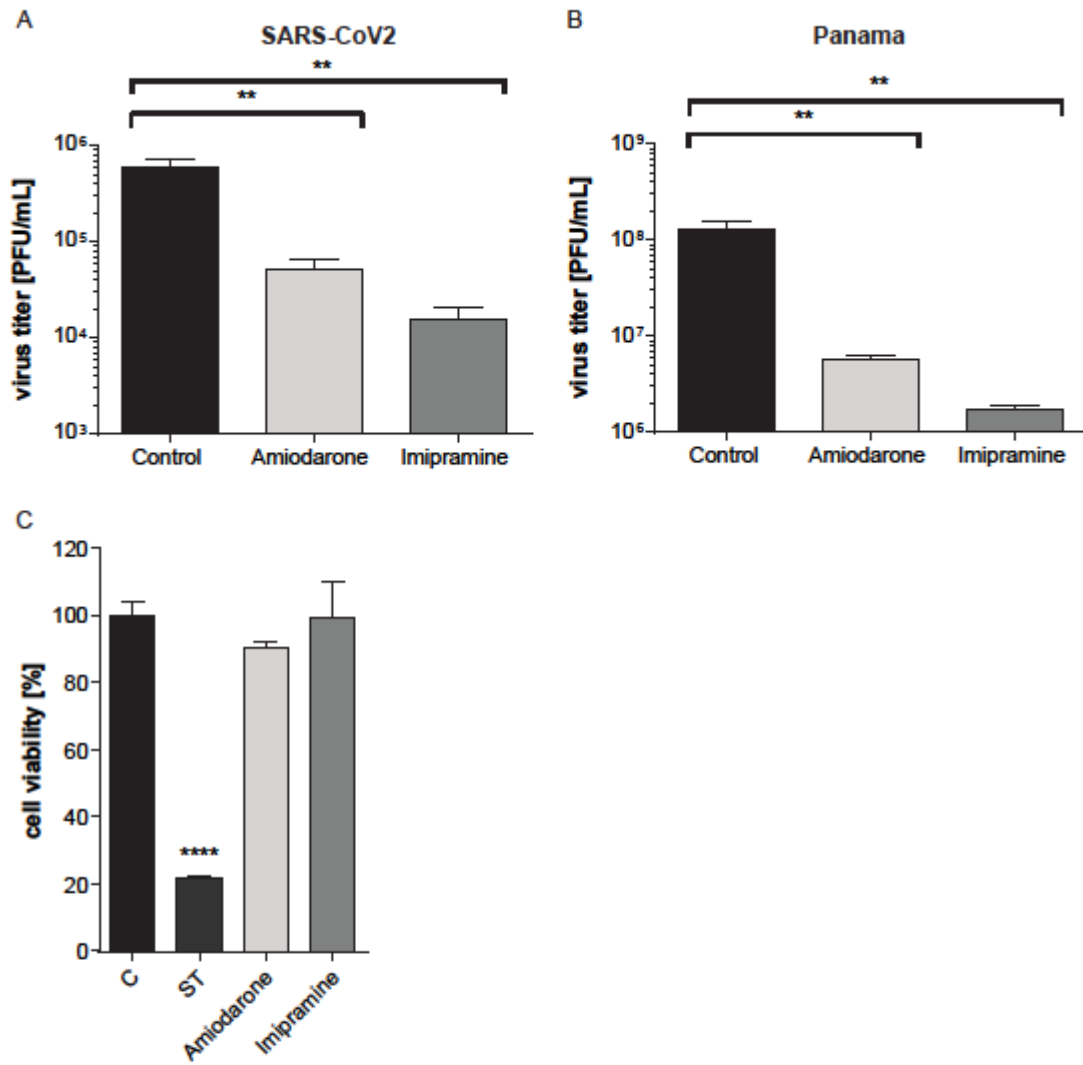

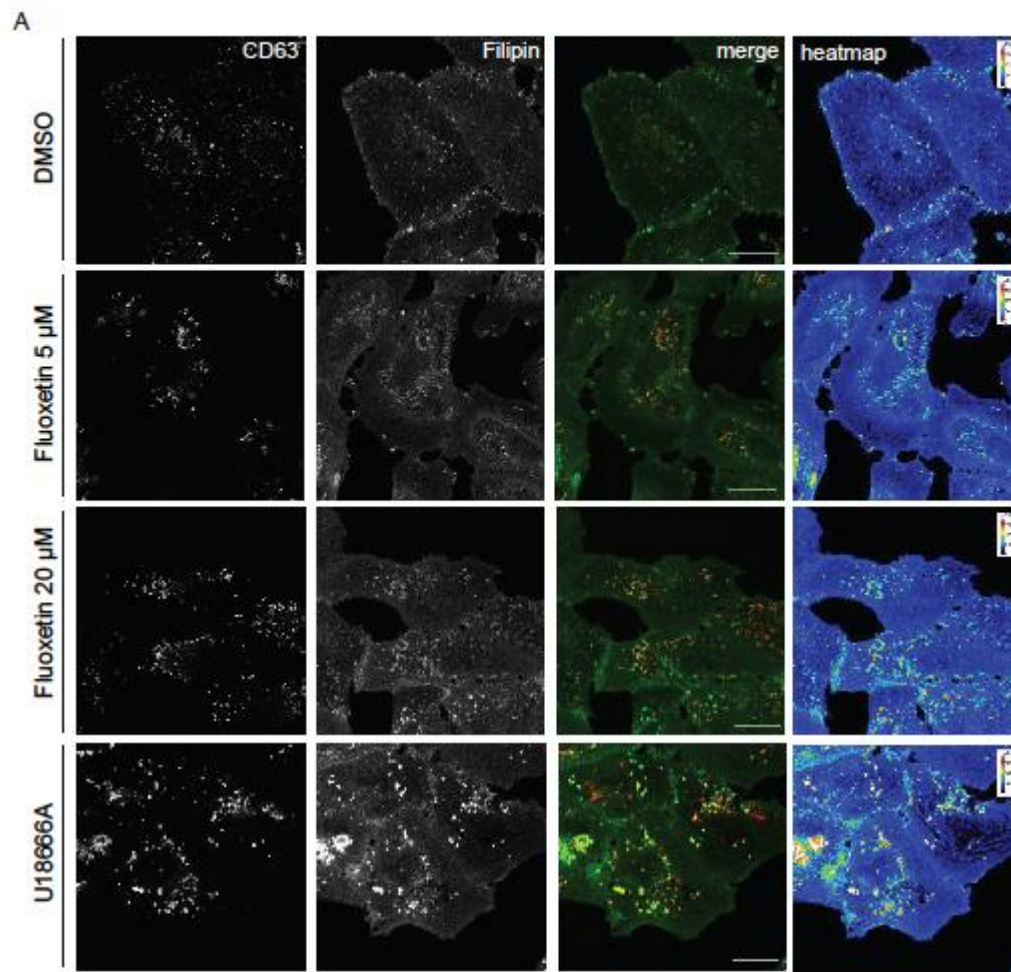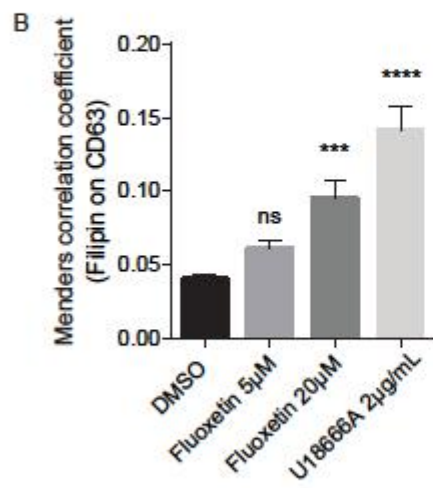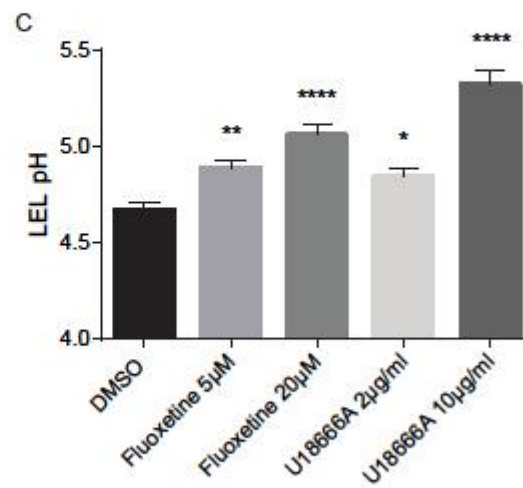

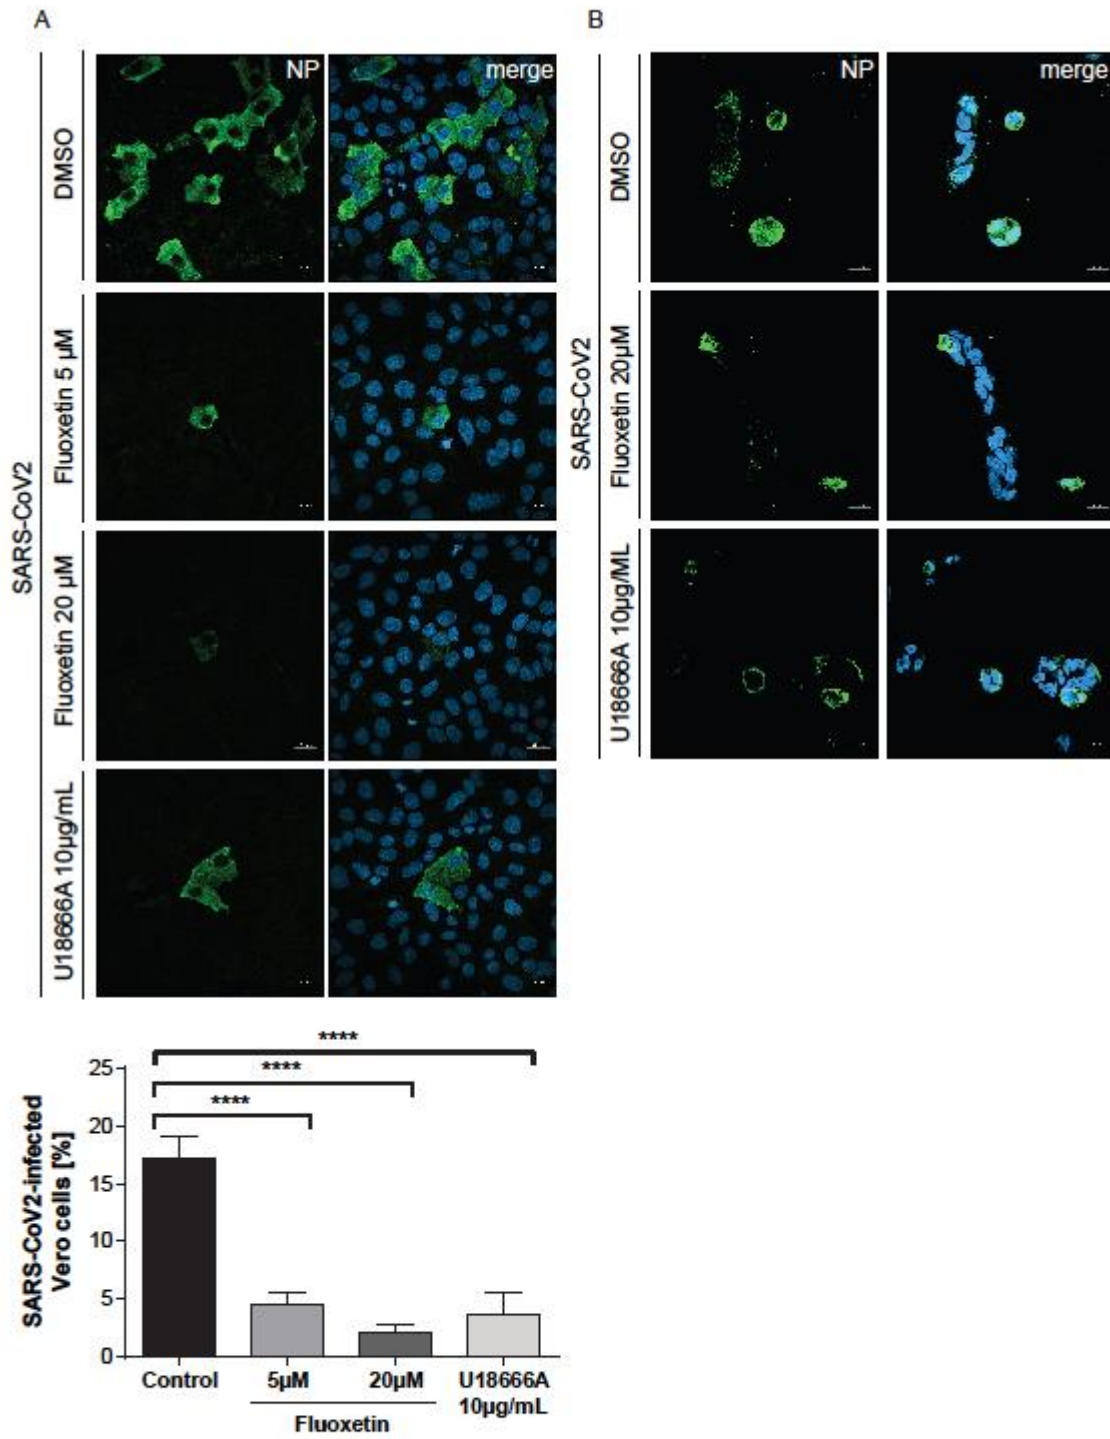

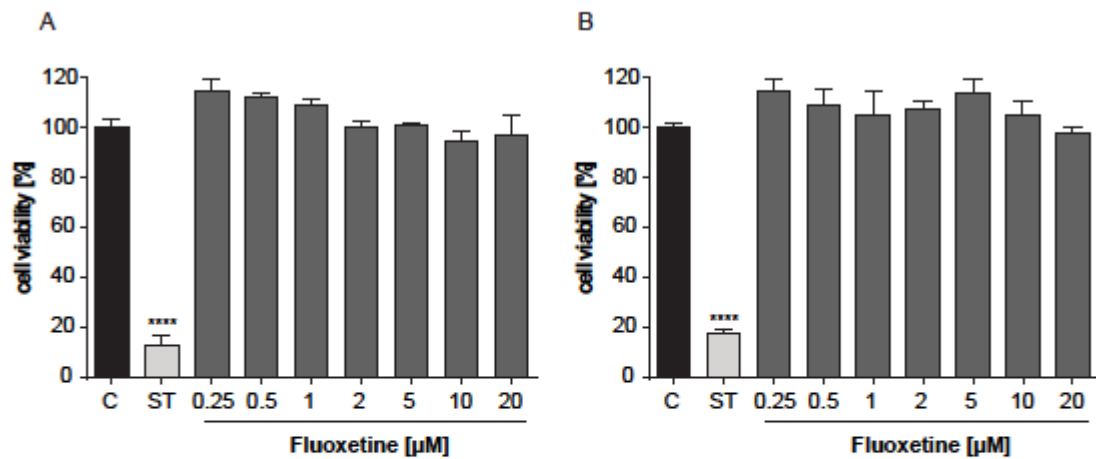

**Suppl. Figure. 1.** Analysis of cell viability. MTT assay of (A) Calu-3 and (B) Vero cells treated with the solvent DMSO (C) or fluoxetine at the indicated concentrations for 48 h. The protein kinase inhibitor staurosporine (ST), a strong inducer of cytotoxicity, served as a positive control. Data represent means  $\pm$  SEM of three independent experiments; one-way ANOVA with Dunett's multiple comparison tests, \*\*\*\*  $p \leq 0.0001$ .
